# Supplementary material for: Ascorbate regulates haematopoietic stem cell function and leukaemogenesis
Source: Springer Nature journal article supplement (doi:10.1038/nature23876), 2017-08-18
Supplement: 41586_2017_BFnature23876_MOESM1_ESM.pdf [file 41586_2017_BFnature23876_MOESM1_ESM.pdf]

# SUPPLEMENTARY INFORMATION

doi:10.1038/nature23876

Extended data Figure 4a

The orientation of some gels has been flipped to improve the readability of the notation

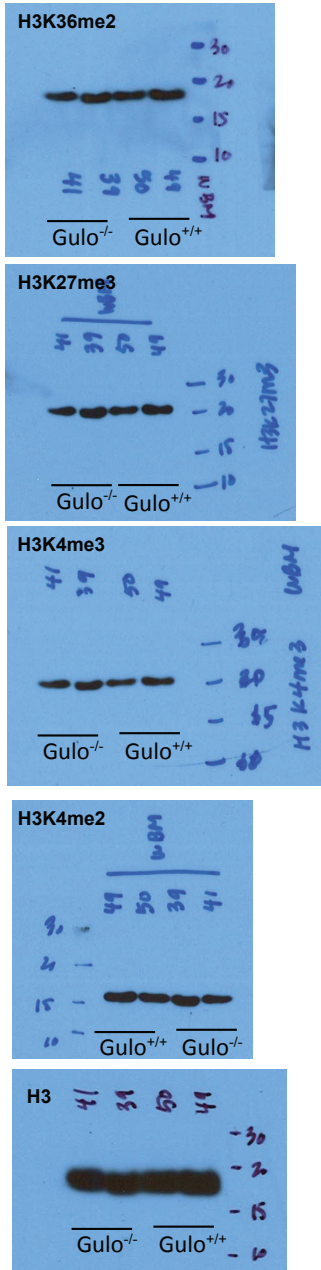

Extended data Figure 10c

Group 1: +/+ to +/+

Group 2: Tet2<sup>Δ/+</sup>;Flt3<sup>ITD/+</sup> to +/+

Group 3: Tet2<sup>Δ/+</sup>;Flt3<sup>ITD/+</sup> to *Gulo*<sup>-/-</sup>

ED Figure 10c shows data from Groups 2 and 3

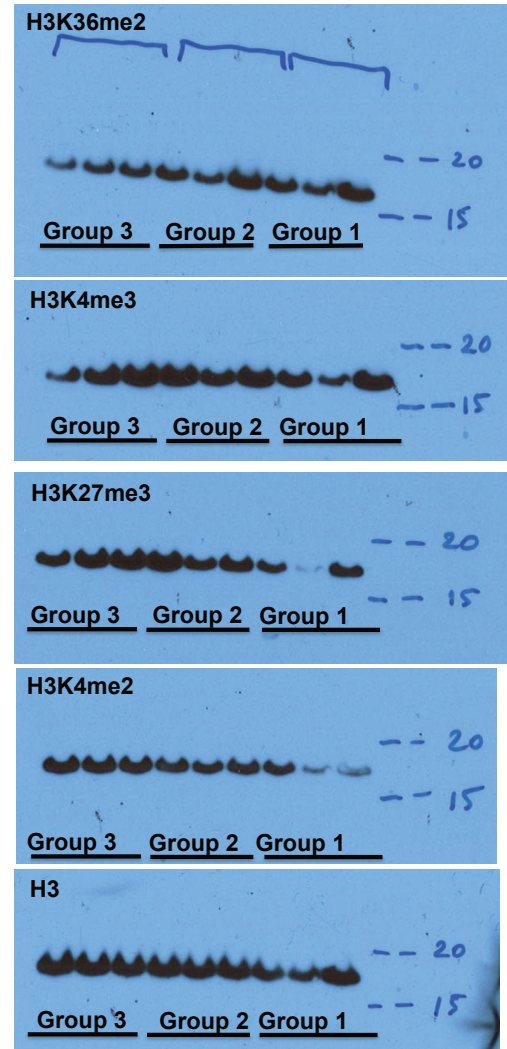

Typical flow cytometry plots and gates that are used to identify the cell populations listed in the bottom right corner

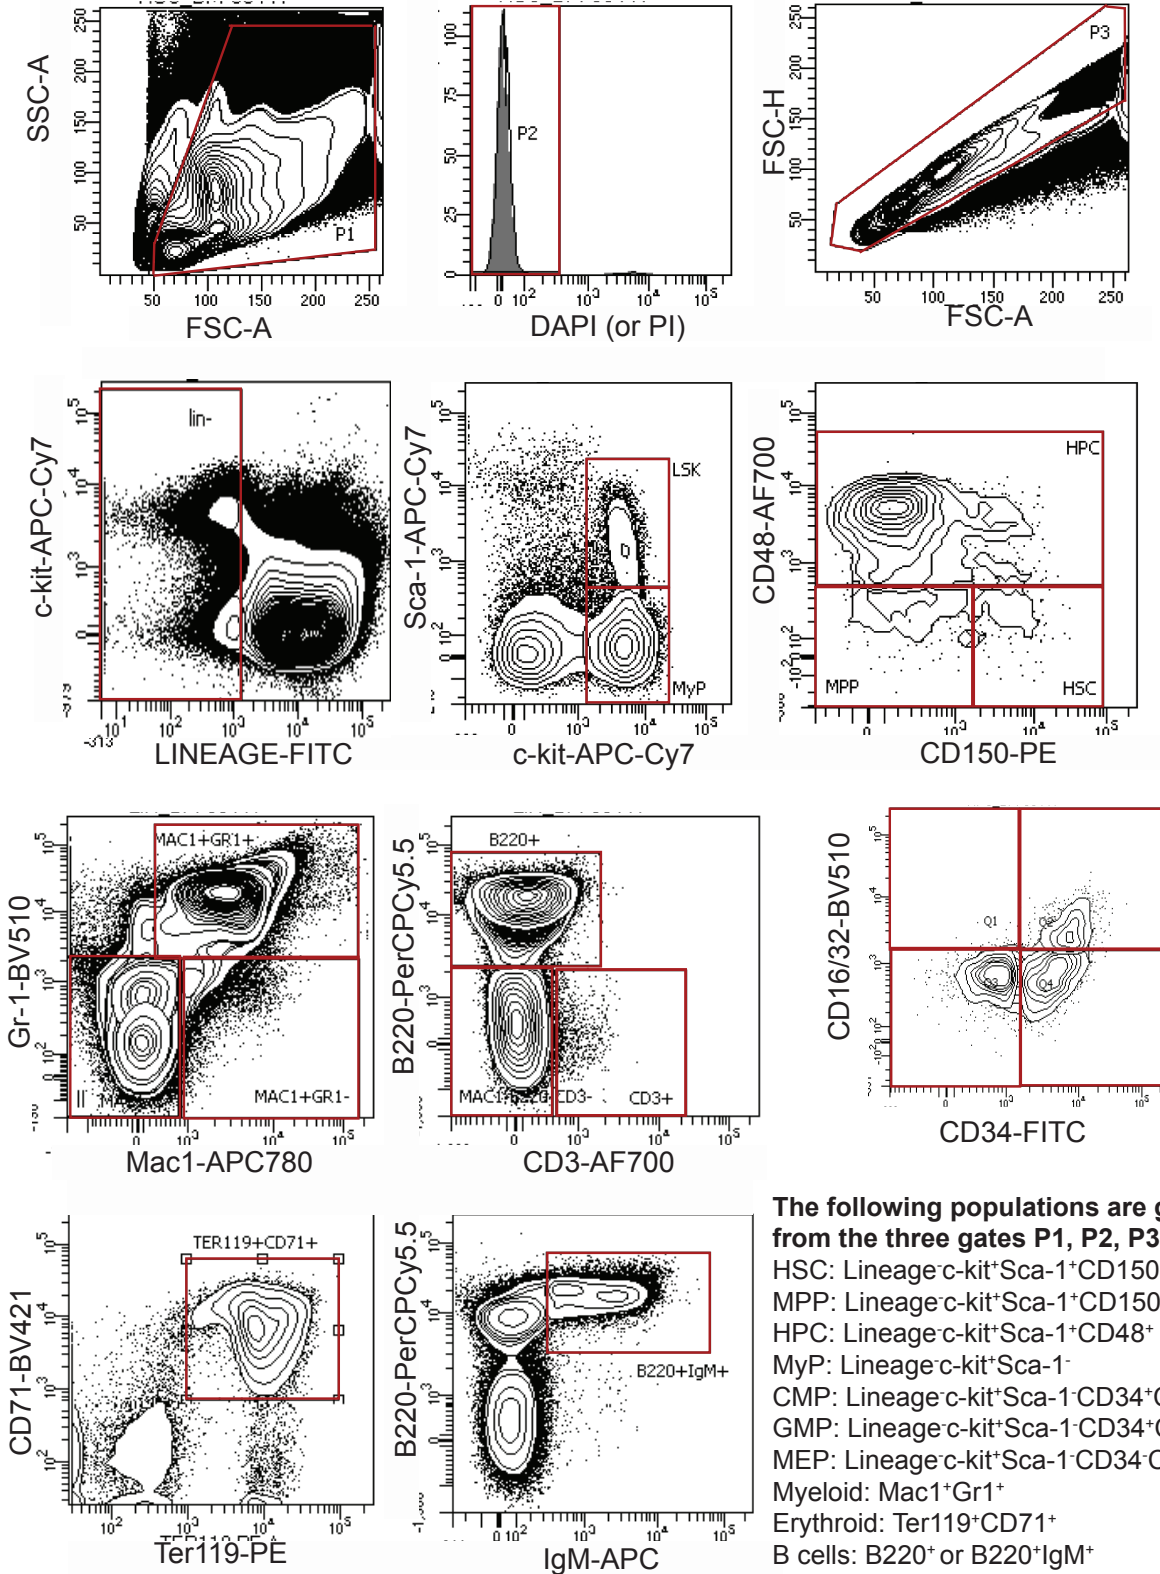

**The following populations are gated from the three gates P1, P2, P3 in the top row**  
 HSC: Lineage<sup>-</sup>c-kit<sup>+</sup>Sca-1<sup>+</sup>CD150<sup>+</sup>CD48<sup>-</sup>  
 MPP: Lineage<sup>-</sup>c-kit<sup>+</sup>Sca-1<sup>+</sup>CD150<sup>+</sup>CD48<sup>-</sup>  
 HPC: Lineage<sup>-</sup>c-kit<sup>+</sup>Sca-1<sup>+</sup>CD48<sup>+</sup>  
 MyP: Lineage<sup>-</sup>c-kit<sup>+</sup>Sca-1<sup>-</sup>  
 CMP: Lineage<sup>-</sup>c-kit<sup>+</sup>Sca-1<sup>-</sup>CD34<sup>+</sup>CD16/32<sup>-</sup>  
 GMP: Lineage<sup>-</sup>c-kit<sup>+</sup>Sca-1<sup>-</sup>CD34<sup>+</sup>CD16/32<sup>+</sup>  
 MEP: Lineage<sup>-</sup>c-kit<sup>+</sup>Sca-1<sup>-</sup>CD34<sup>+</sup>CD16/32<sup>-</sup>  
 Myeloid: Mac1<sup>+</sup>Gr1<sup>+</sup>  
 Erythroid: Ter119<sup>+</sup>CD71<sup>+</sup>  
 B cells: B220<sup>+</sup> or B220<sup>+</sup>IgM<sup>+</sup>  
 T cells: CD3<sup>+</sup>

| Name                                                                 | Clone         | Supplier          | Catalogue # | Lot #          |
|----------------------------------------------------------------------|---------------|-------------------|-------------|----------------|
| <u>Flow cytometry antibodies (for mouse cells)</u>                   |               |                   |             |                |
| CD2                                                                  | RM2-5         | TONBO biosciences | 35-0021     | C0021031114353 |
| CD3 $\epsilon$                                                       | 17A2          | TONBO biosciences | 35-0032     | C003203817353  |
| CD4                                                                  | GK1.5         | eBioscience       | 11-0041-85  | E00079-1631    |
| CD5                                                                  | 53-7.3        | BioLegend         | 100606      | b210716        |
| CD8 $\alpha$                                                         | 53-6.7        | TONBO biosciences | 35-0081     | c0081060514354 |
| CD11b                                                                | M1/70         | eBioscience       | 17-0112-83  | 4305916        |
| CD16/32                                                              | 93            | BioLegend         | 101333      | B228805        |
| CD24                                                                 | M1/69         | BioLegend         | 101822      | B211998        |
| CD25                                                                 | PC61.5        | TONBO biosciences | 65-0251     | C0251102115653 |
| CD34                                                                 | RAM34         | eBioscience       | 50-0341-82  | 4273958        |
| CD43                                                                 | eBioR2/60     | eBioscience       | 11-0431-82  | 4298067        |
| CD44                                                                 | IM7           | BioLegend         | 103030      | B193069        |
| CD45.1                                                               | A20           | TONBO biosciences | 75-0453     | C0453092316753 |
| CD45.2                                                               | 104           | BioLegend         | 109806      | B180276        |
| CD45R/B220                                                           | RA3-6B2       | TONBO biosciences | 35-0452     | C0452011017354 |
| CD48                                                                 | HM48-1        | BioLegend         | 103426      | B236445        |
| CD71                                                                 | R17217        | eBioscience       | 12-0711-83  | E01341-1634    |
| CD117/cKit                                                           | 2B8           | eBioscience       | 47-1171-82  | 4292975        |
| CD127/IL7R $\alpha$                                                  | A7R34         | TONBO biosciences | 50-2171     | C1271052316503 |
| CD135/Flt3                                                           | A2F10         | eBioscience       | 12-1351-83  | E01495-1632    |
| CD150                                                                | TC15-12F12.2  | BioLegend         | 115904      | B210719        |
| Ter119                                                               | TER-119       | BioLegend         | 116206      | B208450        |
| Sca1                                                                 | D7, E13-161.7 | BioLegend         | 122514      | B194434        |
| Gr-1                                                                 | RB6-8C5       | BioLegend         | 108406      | B210647        |
| IgM                                                                  | II/41         | eBioscience       | 17-5790-92  | 4273397        |
| F4/80                                                                | BM8           | BioLegend         | 123110      | B202562        |
| <u>Flow cytometry antibodies (for human cells)</u>                   |               |                   |             |                |
| CD34                                                                 | 4H11          | eBioscience       | 17-0349-42  | E11634-1634    |
| CD45RA                                                               | HI100         | eBioscience       | 12-0458-42  | E13995-103     |
| CD38                                                                 | HIT2          | eBioscience       | 25-0389-42  | E10874-1635    |
| Lineage marker mix<br>CD2, CD3, CD14,<br>CD16, CD19, CD56,<br>CD235A |               |                   |             |                |
|                                                                      | various       | Thermo Fisher     | 22-7778-72  | 4325064        |
| <u>Western Blot antibodies</u>                                       |               |                   |             |                |
| $\beta$ -actin                                                       | AC-74         | Sigma             | A2228       | various        |
| histone H3                                                           | ab1791        | Abcam             | ab1791      | GR265016-1     |
| H3K4me3                                                              | C42D8         | Cell Signaling    | 9751        | 7              |
| H3K27me3                                                             | C36B11        | Cell Signaling    | 9733        | 8              |
| H3K4me2                                                              | C75H12        | Cell Signaling    | 2901        | 1              |
| H3K36me2                                                             | C64G9         | Cell Signaling    | 9725        | 1              |
